# Supplementary material for: Trainer in a pocket - proof-of-concept of mobile, real-time, foot kinematics feedback for gait pattern normalization in individuals after stroke, incomplete spinal cord injury and elderly patients
Source: J Neuroeng Rehabil. 2018 May 29;15:44. doi: 10.1186/s12984-018-0389-4 (PMC5975685; doi:10.1186/s12984-018-0389-4)
Supplement: Supplementary file 3 — Complete dataset of gait parameters and levels measured / calculated by RehaGait. Complete dataset listing average levels per individual per gait analysis, as well as mean gait parameters (stance and swing duration, foot-to-ground angle, stride length) measured by the RehaGait system. (XLSX 58 kb) [file 12984_2018_389_MOESM3_ESM.xlsx]

## Sheet: data_results_RehaGait
ID	GA nr.	visit	pre(1) post(2)	group	training parameter	Level	Level foot-to-ground angle ipsilateral	Level foot-to-ground angle contralateral	Level stance duration ipsilateral	Level stance duration contralateral	Level swing duration ipsilateral	Level swing duration contralateral	Level stride length	foot-to-ground angle [°] ipsilateral	foot-to-ground angle [°] contralateral	foot-to-ground angle [°] reference	stance duration [s] ipsilateral	stance duration [s] contralateral	stance duration [s] reference	swing duration [s] ipsilateral	swing duration [s] contralateral	swing duration [s] reference	stride length [m]	stride length [m] reference	gait speed [m/s]
elderly1	1	1	1	elderly	foot-to-ground angle [°]	3	3	3	0	0	0	0	3	14.503	14.8401	26.4749	0.7395	0.69	0.69802	0.418	0.47	0.389401	0.931256	1.06771	0.715921
elderly1	2	1	2	elderly	foot-to-ground angle [°]	3	3	3	0	0	0	0	3	16.0139	14.79	26.4749	0.705	0.639	0.69802	0.4045	0.459	0.389401	0.941273	1.06771	0.762703
elderly1	3	2	1	elderly	foot-to-ground angle [°]	0	0	3	0	0	0	0	1	25.2612	15.5494	26.4749	0.728	0.671	0.69802	0.369	0.4175	0.389401	0.968766	1.06771	0.769266
elderly1	4	2	2	elderly	foot-to-ground angle [°]	2	2	3	0	1	0	1	1	16.539	15.8869	26.4749	0.6875	0.613	0.69802	0.3925	0.4625	0.389401	0.99851	1.06771	0.81938
elderly1	5	3	1	elderly	foot-to-ground angle [°]	1	1	3	0	1	0	0	2	19.6762	16.0913	26.4749	0.7065	0.6245	0.69802	0.3865	0.4655	0.389401	0.97344	1.06771	0.798311
elderly1	6	3	2	elderly	foot-to-ground angle [°]	4	4	2	0	0	0	0	2	15.6998	15.801	26.4749	0.6565	0.641	0.69802	0.404	0.416	0.389401	0.94217	1.06771	0.795653
elderly2	1	1	1	elderly	foot-to-ground angle [°]	6	6	5	3	4	0	0	11	7.0842	8.96918	26.8325	0.962	1.009	0.690567	0.471	0.415	0.387458	0.606801	1.07064	0.390849
elderly2	2	1	2	elderly	foot-to-ground angle [°]	5	5	4	5	5	1	1	9	10.0748	13.2977	26.8325	1.0465	1.091	0.690567	0.5055	0.449	0.387458	0.696787	1.07064	0.405378
elderly2	3	2	1	elderly	foot-to-ground angle [°]	5	5	3	4	5	1	0	8	11.3708	16.1049	26.8325	1.015	1.071	0.690567	0.509	0.437	0.387458	0.740647	1.07064	0.438933
elderly2	4	2	2	elderly	foot-to-ground angle [°]	5	5	5	4	6	1	0	10	9.45846	10.9475	26.8325	1.034	1.1035	0.690567	0.4635	0.405	0.387458	0.645965	1.07064	0.395492
elderly2	5	3	1	elderly	foot-to-ground angle [°]	6	6	5	2	3	0	0	9	6.91029	10.6921	26.8325	0.8945	0.936	0.690567	0.439	0.395	0.387458	0.67201	1.07064	0.457786
elderly2	6	3	2	elderly	foot-to-ground angle [°]	5	5	3	4	4	1	0	7	10.1571	15.4122	26.8325	0.994286	1.04	0.690567	0.495238	0.4295	0.387458	0.781993	1.07064	0.479291
elderly3	1	1	1	elderly	foot-to-ground angle [°]	5	5	2	5	4	2	2	3	11.0251	17.3824	26.9334	1.0785	1.064	0.689064	0.5255	0.549	0.387229	0.931329	1.07329	0.53356
elderly3	2	1	2	elderly	foot-to-ground angle [°]	2	2	2	3	3	1	2	1	19.711	18.4683	26.9334	0.945	0.912	0.689064	0.4925	0.532	0.387229	0.982416	1.07329	0.616021
elderly3	3	2	1	elderly	foot-to-ground angle [°]	3	3	1	2	2	1	1	2	16.7748	20.7006	26.9334	0.865	0.8455	0.689064	0.4745	0.5015	0.387229	0.975764	1.07329	0.655992
elderly3	4	2	2	elderly	foot-to-ground angle [°]	3	3	1	2	1	0	1	1	15.6912	21.1684	26.9334	0.8395	0.8005	0.689064	0.4475	0.498	0.387229	1.01116	1.07329	0.702748
elderly3	5	3	1	elderly	foot-to-ground angle [°]	3	3	2	2	1	0	0	1	15.9102	18.6685	26.9334	0.827	0.784	0.689064	0.414	0.466	0.387229	1.0107	1.07329	0.724981
elderly3	6	3	2	elderly	foot-to-ground angle [°]	3	3	1	1	1	0	1	2	15.014	20.9001	26.9334	0.8195	0.7595	0.689064	0.431	0.493	0.387229	0.987892	1.07329	0.703518
elderly4	1	1	1	elderly	foot-to-ground angle [°]	6	6	5	0	0	1	0	8	7.78279	9.27815	25.8353	0.7165	0.741	0.713226	0.478	0.437	0.393672	0.724744	1.06181	0.551561
elderly4	2	1	2	elderly	foot-to-ground angle [°]	5	5	5	1	2	4	1	7	8.37076	9.32286	25.8353	0.8645	1.0095	0.713226	0.7395	0.5705	0.393672	0.74929	1.06181	0.441977
elderly4	3	2	1	elderly	foot-to-ground angle [°]	4	4	4	2	2	2	1	6	11.0531	12.1686	25.8353	0.866	0.8915	0.713226	0.5385	0.5235	0.393672	0.805992	1.06181	0.516692
elderly4	4	2	2	elderly	foot-to-ground angle [°]	5	5	5	2	2	2	1	7	10.1241	10.5697	25.8353	0.9085	1.01	0.713226	0.619	0.508	0.393672	0.766888	1.06181	0.47123
elderly4	5	3	1	elderly	foot-to-ground angle [°]	4	4	4	5	5	3	2	8	10.3006	11.5108	25.8353	1.0515	1.0625	0.713226	0.615	0.61	0.393672	0.697714	1.06181	0.383377
elderly4	6	3	2	elderly	foot-to-ground angle [°]	5	5	6	1	1	1	0	9	7.70684	7.82227	25.8353	0.865	0.906	0.713226	0.5225	0.4645	0.393672	0.644818	1.06181	0.440705
elderly5	1	1	1	elderly	foot-to-ground angle [°]	3	3	2	0	0	0	0	2	15.4315	18.5424	26.9747	0.6925	0.7025	0.687841	0.396	0.3915	0.386752	0.974416	1.06959
elderly5	2	1	2	elderly	foot-to-ground angle [°]	1	1	0	0	0	0	0	0	30.8523	25.5964	26.9747	0.7335	0.6995	0.687841	0.3465	0.3775	0.386752	1.08679	1.06959
elderly5	3	2	1	elderly	foot-to-ground angle [°]	0	0	0	0	0	0	0	1	26.3094	24.5857	26.9747	0.6865	0.682	0.687841	0.387	0.369	0.386752	1.11855	1.06959
elderly5	4	2	2	elderly	foot-to-ground angle [°]	1	1	2	1	0	1	0	0	21.1524	18.9037	26.9747	0.6005	0.666818	0.687841	0.477	0.400455	0.386752	1.04193	1.06959
elderly5	5	3	1	elderly	foot-to-ground angle [°]	0	0	0	0	0	0	0	0	25.5854	24.9499	26.9747	0.686	0.692	0.687841	0.356	0.3465	0.386752	1.08132	1.06959
elderly5	6	3	2	elderly	foot-to-ground angle [°]	1	1	1	0	0	0	0	0	23.7189	22.2815	26.9747	0.6825	0.704	0.687841	0.427	0.36	0.386752	1.05639	1.06959
elderly6	1	1	1	elderly	foot-to-ground angle [°]	5	5	4	1	2	0	0	5	11.1136	14.0671	26.7295	0.8265	0.8755	0.693536	0.4495	0.4025	0.388534	0.863725	1.07347
elderly6	2	1	2	elderly	foot-to-ground angle [°]	3	3	4	1	2	1	0	3	14.9057	12.4307	26.7295	0.803	0.8525	0.693536	0.4595	0.4045	0.388534	0.917726	1.07347
elderly6	3	2	1	elderly	foot-to-ground angle [°]	1	1	2	0	1	1	0	0	23.01	20.1866	26.7295	0.747	0.803	0.693536	0.487	0.4185	0.388534	1.04669	1.07347
elderly6	4	2	2	elderly	foot-to-ground angle [°]	2	2	2	1	1	0	0	0	18.8343	19.9471	26.7295	0.776667	0.7845	0.693536	0.430952	0.42	0.388534	1.06648	1.07347
elderly6	5	3	1	elderly	foot-to-ground angle [°]	2	2	2	1	1	0	0	3	18.1423	17.9739	26.7295	0.769	0.81	0.693536	0.443	0.3975	0.388534	0.946656	1.07347
elderly6	6	3	2	elderly	foot-to-ground angle [°]	1	1	3	1	2	1	0	2	22.1622	15.8921	26.7295	0.785	0.83619	0.693536	0.487	0.419524	0.388534	0.979498	1.07347
elderly7	1	1	1	elderly	foot-to-ground angle [°]	6	6	4	0	0	0	0	4	5.68737	11.7792	25.7571	0.767	0.776	0.718207	0.422	0.4145	0.396128	0.883616	1.07099	0.735836
elderly7	2	1	2	elderly	foot-to-ground angle [°]	3	3	4	1	1	0	0	1	14.8509	11.8142	25.7571	0.848	0.7815	0.718207	0.3855	0.454	0.396128	0.998635	1.07099	0.733926
elderly7	3	2	1	elderly	foot-to-ground angle [°]	3	3	3	1	1	0	0	0	14.6009	14.32	25.7571	0.822	0.847	0.718207	0.436	0.414	0.396128	1.05423	1.07099	0.765214
elderly7	4	2	2	elderly	foot-to-ground angle [°]	3	3	3	1	1	0	0	1	15.9799	11.9828	25.7571	0.8265	0.8165	0.718207	0.428	0.4395	0.396128	1.13556	1.07099	0.826723
elderly7	5	3	1	elderly	foot-to-ground angle [°]	1	1	3	2	1	0	0	1	20.5808	13.7983	25.7571	0.9025	0.81	0.718207	0.4125	0.482	0.396128	1.1057	1.07099	0.77616
elderly7	6	3	2	elderly	foot-to-ground angle [°]	3	3	3	2	1	0	0	1	16.9544	13.3635	25.7571	0.835238	0.7995	0.718207	0.451429	0.466	0.396128	1.14409	1.07099	0.829072
elderly8	1	1	1	elderly	foot-to-ground angle [°]	6	6	4	7	7	0	1	8	9.42147	10.3651	26.7219	1.219	1.199	0.692442	0.4885	0.488	0.387823	0.715161	1.06814	0.394904
elderly8	2	1	2	elderly	foot-to-ground angle [°]	4	4	7	7	6	1	2	8	15.3171	7.79456	26.7219	1.143	1.1555	0.692442	0.565	0.552	0.387823	0.715317	1.06814	0.388277
elderly8	3	2	1	elderly	foot-to-ground angle [°]	2	2	4	7	7	1	1	7	17.9264	12.387	26.7219	1.197	1.2015	0.692442	0.525	0.5235	0.387823	0.751986	1.06814	0.398648
elderly8	4	2	2	elderly	foot-to-ground angle [°]	4	4	5	6	5	0	1	7	15.295	9.00371	26.7219	1.1245	1.0725	0.692442	0.4455	0.508	0.387823	0.76681	1.06814	0.448763
elderly8	5	3	1	elderly	foot-to-ground angle [°]	5	5	4	9	8	1	1	9	13.067	11.7199	26.7219	1.3285	1.3045	0.692442	0.544	0.5415	0.387823	0.723122	1.06814	0.369336
elderly8	6	3	2	elderly	foot-to-ground angle [°]	2	2	8	6	6	0	1	7	17.446	4.21028	26.7219	1.11	1.119	0.692442	0.477	0.467	0.387823	0.776059	1.06814	0.45486
elderly9	1	1	1	elderly	foot-to-ground angle [°]	6	6	6	3	4	0	0	10	5.1185	6.87917	26.4779	0.975	1.026	0.698481	0.442	0.4065	0.389702	0.629716	1.0697	0.420004
elderly9	2	1	2	elderly	foot-to-ground angle [°]	6	6	6	4	4	0	0	9	7.5889	7.10321	26.4779	0.997	1.0165	0.698481	0.4195	0.417	0.389702	0.668635	1.0697	0.44022
elderly9	3	2	1	elderly	foot-to-ground angle [°]	5	5	4	5	4	1	1	8	8.19049	13.7197	26.4779	1.0305	1.0005	0.698481	0.495	0.5395	0.389702	0.723187	1.0697	0.478587
elderly9	4	2	2	elderly	foot-to-ground angle [°]	6	6	5	2	2	0	0	8	6.06901	7.02036	26.4779	0.8245	0.8395	0.698481	0.426	0.4175	0.389702	0.700763	1.0697	0.558725
elderly9	5	3	1	elderly	foot-to-ground angle [°]	5	5	4	4	4	1	1	6	10.1378	10.709	26.4779	1.008	1.0155	0.698481	0.4725	0.491	0.389702	0.786227	1.0697	0.486718
elderly9	6	3	2	elderly	foot-to-ground angle [°]	6	6	6	1	2	0	0	7	7.1879	7.25864	26.4779	0.823	0.86	0.698481	0.435	0.3865	0.389702	0.75432	1.0697	0.561341
elderly10	1	1	1	elderly	stride length [m]	4	6	4	0	0	1	0	4	7.82853	12.9681	26.4904	0.7415	0.761	0.700908	0.462	0.4505	0.391458	0.896074	1.07617	0.672456
elderly10	2	1	2	elderly	stride length [m]	2	2	0	0	0	0	0	2	17.6222	23.9985	26.4904	0.652	0.6715	0.700908	0.3815	0.3555	0.391458	1.16756	1.07617	0.968445
elderly10	3	2	1	elderly	stride length [m]	0	4	2	0	0	0	0	0	13.5836	17.028	26.4904	0.6785	0.6995	0.700908	0.418	0.412	0.391458	1.09077	1.07617	0.872128
elderly10	4	2	2	elderly	stride length [m]	1	2	1	0	0	0	0	1	17.3356	22.0494	26.4904	0.644	0.662	0.700908	0.378	0.3665	0.391458	1.12428	1.07617	0.945984
elderly10	5	3	1	elderly	stride length [m]	0	3	2	0	0	1	0	0	14.6085	15.5481	26.4904	0.7625	0.7235	0.700908	0.331	0.385	0.391458	1.05217	1.07617	0.841118
elderly10	6	3	2	elderly	stride length [m]	0	3	2	0	0	0	0	0	15.9151	19.1729	26.4904	0.7075	0.7165	0.700908	0.3835	0.38	0.391458	1.05918	1.07617	0.843312
elderly11	1	1	1	elderly	foot-to-ground angle [°]	6	6	6	0	0	0	0	3	6.8001	8.09361	25.8419	0.7725	0.7645	0.714141	0.4435	0.4525	0.394263	0.903397	1.06648	0.678245
elderly11	2	1	2	elderly	foot-to-ground angle [°]	1	1	2	2	2	0	0	3	18.7759	17.0884	25.8419	0.8745	0.86	0.714141	0.4645	0.468	0.394263	0.918908	1.06648	0.600861
elderly11	3	2	1	elderly	foot-to-ground angle [°]	2	2	2	1	1	1	1	2	17.9787	18.1251	25.8419	0.849	0.8385	0.714141	0.4865	0.4845	0.394263	0.960754	1.06648	0.632718
elderly11	4	2	2	elderly	foot-to-ground angle [°]	2	2	2	0	1	0	0	2	17.0439	18.8328	25.8419	0.761	0.7915	0.714141	0.4765	0.438	0.394263	0.984614	1.06648	0.700613
elderly11	5	3	1	elderly	foot-to-ground angle [°]	1	1	2	2	2	1	1	3	20.5338	17.9568	25.8419	0.9095	0.9	0.714141	0.4855	0.4875	0.394263	0.930187	1.06648	0.582503
elderly11	6	3	2	elderly	foot-to-ground angle [°]	1	1	2	2	1	1	1	1	20.1632	16.2907	25.8419	0.888	0.884	0.714141	0.5225	0.536	0.394263	0.962193	1.06648	0.615118
elderly12	1	1	1	elderly	stride length [m]	10	6	5	5	7	2	0	10	5.90865	9.11147	26.2473	1.108	1.2225	0.70214	0.551	0.453	0.389741	0.605836	1.0516	0.324813
elderly12	2	1	2	elderly	stride length [m]	6	6	3	4	4	1	0	6	7.30977	14.9227	26.2473	0.988	1.0585	0.70214	0.482	0.439	0.389741	0.799341	1.0516	0.500292
elderly12	3	2	1	elderly	stride length [m]	8	6	5	3	4	1	1	8	7.14984	10.3363	26.2473	0.98	1.0225	0.70214	0.5245	0.4775	0.389741	0.699473	1.0516	0.429038
elderly12	4	2	2	elderly	stride length [m]	7	6	4	2	2	0	0	7	6.5988	10.81	26.2473	0.869	0.912	0.70214	0.4555	0.412	0.389741	0.736385	1.0516	0.50906
elderly12	5	3	1	elderly	stride length [m]	7	6	5	3	3	0	0	7	5.75614	10.1917	26.2473	0.956	0.9815	0.70214	0.4335	0.4205	0.389741	0.749473	1.0516	0.496971
elderly12	6	3	2	elderly	stride length [m]	8	6	5	4	4	1	0	8	5.89824	7.81078	26.2473	0.9745	1.0285	0.70214	0.469	0.4225	0.389741	0.697935	1.0516	0.458444
elderly13	1	1	1	elderly	stance duration [s]	6	7	8	6	2	0	3	7	2.10446	0.064415	26.7264	1.145	0.8795	0.693037	0.35	0.62	0.388205	0.779706	1.07148
elderly13	2	1	2	elderly	stance duration [s]	11	6	7	11	9	1	4	5	7.76151	2.77562	26.7264	1.49238	1.30952	0.693037	0.510476	0.705714	0.388205	0.853027	1.07148
elderly13	3	2	1	elderly	stance duration [s]	7	6	4	7	5	0	2	3	7.5739	14.2061	26.7264	1.1755	1.048	0.693037	0.455	0.5875	0.388205	0.946487	1.07148
elderly13	4	2	2	elderly	stance duration [s]	7	6	4	7	5	0	3	5	6.26054	11.9846	26.7264	1.2305	1.0875	0.693037	0.446	0.602	0.388205	0.858974	1.07148
elderly13	5	3	1	elderly	stance duration [s]	7	6	5	7	5	1	3	3	5.21652	11.1606	26.7264	1.2135	1.089	0.693037	0.499	0.636	0.388205	0.913512	1.07148
elderly13	6	3	2	elderly	stance duration [s]	7	6	4	7	5	1	3	5	7.01326	13.1389	26.7264	1.2075	1.098	0.693037	0.494	0.6045	0.388205	0.86473	1.07148
elderly14	1	1	1	elderly	foot-to-ground angle [°]	2	2	1	2	2	0	1	3	17.8829	20.7175	26.8404	0.8575	0.8225	0.691756	0.4555	0.4905	0.388237	0.948454	1.07595	0.637754
elderly14	2	1	2	elderly	foot-to-ground angle [°]	1	1	0	2	2	0	1	1	23.1793	23.8087	26.8404	0.8615	0.826	0.691756	0.4485	0.479	0.388237	1.02384	1.07595	0.682249
elderly14	3	2	1	elderly	foot-to-ground angle [°]	0	0	2	3	1	0	1	2	24.8885	19.1008	26.8404	0.9265	0.798	0.691756	0.415	0.5345	0.388237	0.938821	1.07595	0.618806
elderly14	4	2	2	elderly	foot-to-ground angle [°]	0	0	1	2	1	0	1	2	26.8815	20.9429	26.8404	0.853	0.7795	0.691756	0.412	0.477	0.388237	0.988091	1.07595	0.686252
elderly14	5	3	1	elderly	foot-to-ground angle [°]	0	0	1	2	2	0	1	1	24.567	22.2871	26.8404	0.8915	0.833	0.691756	0.4395	0.4925	0.388237	1.00556	1.07595	0.669355
elderly14	6	3	2	elderly	foot-to-ground angle [°]	0	0	0	1	1	0	0	0	25.588	27.5591	26.8404	0.7945	0.7695	0.691756	0.4255	0.447	0.388237	1.10494	1.07595	0.797107
elderly15	1	1	1	elderly	foot-to-ground angle [°]	4	4	3	6	5	1	2	3	11.8035	15.566	26.0978	1.1485	1.0935	0.706644	0.4955	0.557	0.391756	0.916511	1.06381
elderly15	2	1	2	elderly	foot-to-ground angle [°]	1	1	2	6	5	2	3	3	20.9806	17.7615	26.0978	1.1155	1.1	0.706644	0.5505	0.6075	0.391756	0.906651	1.06381
elderly15	3	2	1	elderly	foot-to-ground angle [°]	2	2	2	2	2	1	1	2	16.9539	16.8751	26.0978	0.869	0.872	0.706644	0.47	0.4995	0.391756	0.967774	1.06381
elderly15	4	2	2	elderly	foot-to-ground angle [°]	0	0	2	4	3	1	1	2	24.3575	17.625	26.0978	0.98	0.973	0.706644	0.4915	0.5025	0.391756	0.964178	1.06381
elderly15	5	3	1	elderly	foot-to-ground angle [°]	1	1	2	3	2	0	1	1	20.2329	17.6964	26.0978	0.925	0.8895	0.706644	0.45	0.4755	0.391756	1.0224	1.06381
elderly15	6	3	2	elderly	foot-to-ground angle [°]	1	1	2	5	5	1	2	2	22.378	19.324	26.0978	1.105	1.05	0.706644	0.4795	0.5325	0.391756	0.954853	1.06381
iSCI3	1	1	1	iSCI	foot-to-ground angle [°]	3	3	3	2	2	0	0	0	16.0237	16.9247	27.3299	0.8476	0.8384	0.685949	0.4052	0.4172	0.387762	1.08058	1.08755	0.77217
iSCI3	2	1	2	iSCI	foot-to-ground angle [°]	1	1	2	4	4	1	1	0	22.2034	18.5198	27.3299	0.9984	0.998	0.685949	0.4568	0.4596	0.387762	1.09634	1.08755	0.675436
iSCI3	3	2	1	iSCI	foot-to-ground angle [°]	3	3	3	2	2	0	0	0	18.1423	15.4523	27.3299	0.8908	0.8796	0.685949	0.4304	0.4376	0.387762	1.05649	1.08755	0.716576
iSCI3	4	2	2	iSCI	foot-to-ground angle [°]	1	1	2	4	4	1	1	0	23.8116	18.1224	27.3299	1.0172	1.0064	0.685949	0.4816	0.4852	0.387762	1.06064	1.08755	0.6332
iSCI3	5	3	1	iSCI	foot-to-ground angle [°]	1	1	3	3	3	0	1	0	21.3155	16.201	27.3299	0.9492	0.9324	0.685949	0.4496	0.4592	0.387762	1.07154	1.08755	0.690118
iSCI3	6	3	2	iSCI	foot-to-ground angle [°]	0	0	2	5	5	1	1	1	25.7048	20.1678	27.3299	1.058	1.0376	0.685949	0.5308	0.5588	0.387762	1.04037	1.08755	0.579437
iSCI3	7	4	1	iSCI	foot-to-ground angle [°]	2	2	2	1	1	0	0	0	19.9716	19.1228	27.3299	0.8156	0.8208	0.685949	0.4104	0.4024	0.387762	1.13217	1.08755	0.815495
iSCI4	1	1	1	iSCI	foot-to-ground angle [°]	4	4	2	3	3	0	0	4	13.1033	20.0721	27.5127	0.954	0.9184	0.688301	0.4332	0.4696	0.38994	0.913271	1.09146	0.591584
iSCI4	2	1	2	iSCI	foot-to-ground angle [°]	1	1	1	4	4	0	1	4	21.7437	24.7293	27.5127	0.9748	0.9728	0.688301	0.4896	0.4912	0.38994	0.938862	1.09146	0.566628
iSCI4	3	2	1	iSCI	foot-to-ground angle [°]	3	3	2	2	2	0	0	3	17.2626	19.6107	27.5127	0.8768	0.8452	0.688301	0.4388	0.4644	0.38994	0.973088	1.09146	0.667184
iSCI4	4	2	2	iSCI	foot-to-ground angle [°]	0	0	0	3	2	0	0	1	25.9974	21.8778	27.5127	0.8932	0.8504	0.688301	0.4484	0.4844	0.38994	1.01604	1.09146	0.679232
iSCI4	5	3	1	iSCI	foot-to-ground angle [°]	2	2	2	2	2	0	0	2	18.0349	19.9002	27.5127	0.866	0.8452	0.688301	0.4408	0.466	0.38994	0.99125	1.09146	0.682614
iSCI4	6	3	2	iSCI	foot-to-ground angle [°]	2	2	0	6	5	1	2	4	20.2452	24.8748	27.5127	1.1176	1.062	0.688301	0.4828	0.5384	0.38994	0.896991	1.09146	0.501843
iSCI4	7	4	1	iSCI	foot-to-ground angle [°]	4	4	1	3	2	0	1	2	15.7936	21.194	27.5127	0.9268	0.8448	0.688301	0.4324	0.516	0.38994	0.994012	1.09146	0.657668
iSCI1	1	1	1	iSCI	foot-to-ground angle [°]	0	0	0	0	0	0	0	3	28.4757	27.8383	27.4837	0.6832	0.6736	0.695239	0.354	0.3624	0.394657	1.26116	1.09702	1.06698
iSCI1	2	1	2	iSCI	foot-to-ground angle [°]	1	1	0	0	0	0	0	3	20.6751	26.483	27.4837	0.6772	0.7208	0.695239	0.4172	0.3804	0.394657	1.21939	1.09702	0.978016
iSCI1	3	2	1	iSCI	foot-to-ground angle [°]	0	0	0	0	0	0	0	2	25.249	27.7088	27.4837	0.6976	0.71	0.695239	0.3676	0.3568	0.394657	1.20045	1.09702	0.976142
iSCI1	4	2	2	iSCI	foot-to-ground angle [°]	0	0	0	0	0	0	0	2	24.7608	26.9961	27.4837	0.7204	0.734	0.695239	0.3784	0.366	0.394657	1.21101	1.09702	0.963828
iSCI1	5	3	1	iSCI	foot-to-ground angle [°]	0	0	1	0	0	0	0	1	24.6978	23.1687	27.4837	0.7176	0.714	0.695239	0.3652	0.3708	0.394657	1.16118	1.09702	0.946318
iSCI1	6	3	2	iSCI	foot-to-ground angle [°]	0	0	0	0	0	0	0	3	27.6468	26.2131	27.4837	0.7084	0.7064	0.695239	0.372	0.3744	0.394657	1.23154	1.09702	1.00557
iSCI1	7	4	1	iSCI	foot-to-ground angle [°]	0	0	0	0	0	0	0	1	26.6742	26.1871	27.4837	0.6988	0.7032	0.695239	0.3556	0.352	0.394657	1.14844	1.09702	0.963143
iSCI2	1	1	1	iSCI	stride length [m]	14	9	7	9	8	2	5	14	-1.69148	2.72274	27.4978	1.305	1.2484	0.688013	0.565385	0.6912	0.38979	0.504145	1.0972	0.254652
iSCI2	2	1	2	iSCI	stride length [m]	8	5	5	16	16	3	3	8	11.7685	11.4977	27.4978	1.7856	1.776	0.688013	0.6844	0.6788	0.38979	0.781371	1.0972	0.307462
iSCI2	3	2	1	iSCI	stride length [m]	7	5	5	15	15	5	4	7	10.8897	11.8136	27.4978	1.7776	1.7868	0.688013	0.7564	0.758	0.38979	0.795271	1.0972	0.314648
iSCI2	4	2	2	iSCI	stride length [m]	4	3	3	11	12	6	5	4	14.8831	17.6999	27.4978	1.5008	1.5528	0.688013	0.812	0.7628	0.38979	0.917477	1.0972	0.388194
iSCI2	5	3	1	iSCI	stride length [m]	4	4	4	12	12	4	3	4	12.9457	12.5917	27.4978	1.5084	1.5628	0.688013	0.7276	0.686	0.38979	0.918887	1.0972	0.384546
iSCI2	6	3	2	iSCI	stride length [m]	3	3	4	9	9	4	4	3	16.6175	13.9746	27.4978	1.3564	1.3608	0.688013	0.696	0.6808	0.38979	0.96974	1.0972	0.43975
iSCI2	7	4	1	iSCI	stride length [m]	2	5	4	7	8	4	3	2	12.4195	12.8215	27.4978	1.2248	1.2616	0.688013	0.6784	0.6436	0.38979	0.997034	1.0972	0.491364
iSCI5	1	1	1	iSCI	foot-to-ground angle [°]	2	2	1	0	4	0	5	7	17.7077	20.0843	27.3729	0.674	0.4356	0.689774	0.446	0.6808	0.3907	1.39921	1.09836	1.12439
iSCI5	2	1	2	iSCI	foot-to-ground angle [°]	3	3	3	0	2	1	4	6	17.5693	15.1327	27.3729	0.6976	0.5752	0.689774	0.4884	0.6088	0.3907	1.38447	1.09836	1.07003
iSCI5	3	2	1	iSCI	foot-to-ground angle [°]	2	2	1	0	1	1	0	6	19.3377	20.0709	27.3729	0.6792	0.6672	0.689774	0.4792	0.488	0.3907	1.35686	1.09836	1.07836
iSCI5	4	2	2	iSCI	foot-to-ground angle [°]	3	3	2	0	1	0	0	7	14.8522	17.7218	27.3729	0.6796	0.7284	0.689774	0.448	0.3964	0.3907	1.38888	1.09836	1.16753
iSCI5	5	3	1	iSCI	foot-to-ground angle [°]	2	2	2	0	3	0	4	7	20.4755	18.2491	27.3729	0.6936	0.504	0.689774	0.4524	0.6408	0.3907	1.40152	1.09836	1.11057
iSCI5	6	3	2	iSCI	foot-to-ground angle [°]	1	1	1	0	2	0	3	8	20.4406	18.8445	27.3729	0.6988	0.5188	0.689774	0.438	0.6168	0.3907	1.40753	1.09836	1.12974
iSCI5	7	4	1	iSCI	foot-to-ground angle [°]
iSCI12	1	1	1	iSCI	foot-to-ground angle [°]	5	5	2	0	2	2	1	0	8.66434	21.6967	27.4193	0.7112	0.8032	0.69158	0.6192	0.5212	0.393891	1.0781	1.0768	0.734768
iSCI12	2	1	2	iSCI	foot-to-ground angle [°]	7	7	2	2	4	3	1	0	6.13745	18.9834	27.4193	0.8	0.9808	0.69158	0.6884	0.5116	0.393891	1.12116	1.0768	0.702709
iSCI12	3	2	1	iSCI	foot-to-ground angle [°]	4	4	2	2	3	2	1	0	12.2986	19.8103	27.4193	0.8084	0.9164	0.69158	0.6056	0.5024	0.393891	1.05917	1.0768	0.730803
iSCI12	4	2	2	iSCI	foot-to-ground angle [°]	6	6	3	0	2	2	1	0	8.32221	18.3489	27.4193	0.7164	0.8308	0.69158	0.6356	0.5284	0.393891	1.11416	1.0768	0.789229
iSCI12	5	3	1	iSCI	foot-to-ground angle [°]	5	5	2	2	3	2	1	0	11.0413	18.0916	27.4193	0.8084	0.9248	0.69158	0.624	0.5288	0.393891	1.08849	1.0768	0.711659
iSCI12	6	3	2	iSCI	foot-to-ground angle [°]	6	6	3	1	2	2	1	1	7.69086	16.9673	27.4193	0.7664	0.8568	0.69158	0.6392	0.5424	0.393891	1.10738	1.0768	0.742263
iSCI12	7	4	1	iSCI	foot-to-ground angle [°]	6	6	1	0	2	2	1	0	7.16024	23.7404	27.4193	0.7028	0.8244	0.69158	0.628	0.5236	0.393891	1.03848	1.0768	0.729904
iSCI7	1	1	1	iSCI	stride length [m]	13	10	8	20	16	1	4	13	-3.63742	-0.52086	27.4439	2.0652	1.8156	0.688477	0.5008	0.7532	0.389973	0.577486	1.09892	0.219534
iSCI7	2	1	2	iSCI	stride length [m]	10	10	8	17	17	2	3	10	-3.2136	-1.32077	27.4439	1.9472	1.8664	0.688477	0.5552	0.624	0.389973	0.638762	1.09892	0.246323
iSCI7	3	2	1	iSCI	stride length [m]	12	10	8	23	20	1	4	12	-2.97898	-1.29664	27.4439	2.216	2.1408	0.688477	0.56	0.682	0.389973	0.562694	1.09892	0.202543
iSCI7	4	2	2	iSCI	stride length [m]	9	10	9	17	16	2	3	9	-3.80108	-0.689636	27.4439	1.9668	1.8364	0.688477	0.5156	0.632	0.389973	0.678088	1.09892	0.267556
iSCI7	5	3	1	iSCI	stride length [m]	13	9	8	22	19	2	5	13	-1.59396	-0.692762	27.4439	2.2324	2.0288	0.688477	0.616	0.8044	0.389973	0.529228	1.09892	0.196674
iSCI7	6	3	2	iSCI	stride length [m]	12	9	8	20	17	3	5	12	-2.93044	-0.550834	27.4439	2.0316	1.8784	0.688477	0.594	0.7716	0.389973	0.581231	1.09892	0.219244
iSCI7	7	4	1	iSCI	stride length [m]
iSCI6	1	1	1	iSCI	stance duration [s]	3	7	3	3	7	4	1	6	3.76061	18.4492	27.399	0.9344	1.1756	0.686542	0.7488	0.5032	0.388479	0.825262	1.09222	0.452055
iSCI6	2	1	2	iSCI	stance duration [s]	2	6	2	2	6	3	0	4	7.95765	19.4455	27.399	0.8476	1.0684	0.686542	0.718	0.4936	0.388479	0.935311	1.09222	0.548238
iSCI6	3	2	1	iSCI	stance duration [s]	2	8	3	2	6	4	1	5	2.5101	17.2284	27.399	0.872	1.1076	0.686542	0.724	0.4804	0.388479	0.870342	1.09222	0.505268
iSCI6	4	2	2	iSCI	stance duration [s]	2	8	3	2	6	3	0	5	2.69747	14.2275	27.399	0.87	1.11	0.686542	0.7124	0.4592	0.388479	0.871923	1.09222	0.520393
iSCI6	5	3	1	iSCI	stance duration [s]	2	7	2	2	5	3	0	3	5.36635	20.7429	27.399	0.8336	1.006	0.686542	0.6904	0.508	0.388479	0.942599	1.09222	0.5685
iSCI6	6	3	2	iSCI	stance duration [s]	3	6	2	3	6	3	0	4	6.80814	18.4269	27.399	0.9448	1.092	0.686542	0.6636	0.5076	0.388479	0.909608	1.09222	0.533001
iSCI6	7	4	1	iSCI	stance duration [s]	3	7	4	3	6	3	0	6	6.58713	14.2418	27.399	0.9216	1.1316	0.686542	0.6364	0.4264	0.388479	0.816062	1.09222	0.479869
iSCI8	1	1	1	iSCI	foot-to-ground angle [°]	3	3	1	1	1	0	0	3	15.4081	22.912	26.9847	0.7608	0.758	0.689097	0.458	0.4564	0.387587	1.22953	1.07766	0.913569
iSCI8	2	1	2	iSCI	foot-to-ground angle [°]	1	1	1	1	1	0	1	5	21.6288	21.8568	26.9847	0.7916	0.784	0.689097	0.4572	0.4672	0.387587	1.29537	1.07766	0.930697
iSCI8	3	2	1	iSCI	foot-to-ground angle [°]	2	2	1	1	1	0	0	5	19.4467	21.7091	26.9847	0.7636	0.778	0.689097	0.4596	0.4424	0.387587	1.32394	1.07766	0.970002
iSCI8	4	2	2	iSCI	foot-to-ground angle [°]	2	2	1	1	0	0	0	7	20.2945	19.5329	26.9847	0.7448	0.704	0.689097	0.4428	0.48	0.387587	1.37134	1.07766	1.0394
iSCI8	5	3	1	iSCI	foot-to-ground angle [°]	1	1	0	0	0	0	0	6	23.1058	25.6304	26.9847	0.704	0.7208	0.689097	0.4532	0.4416	0.387587	1.36298	1.07766	1.03485
iSCI8	6	3	2	iSCI	foot-to-ground angle [°]	1	1	0	0	0	0	0	7	21.7457	27.7058	26.9847	0.7412	0.6828	0.689097	0.4372	0.4932	0.387587	1.37234	1.07766	1.02361
iSCI8	7	4	1	iSCI	foot-to-ground angle [°]	1	1	2	0	0	0	0	9	21.547	20.638	26.9847	0.694	0.6888	0.689097	0.4592	0.4596	0.387587	1.4258	1.07766	1.09469
iSCI9	1	1	1	iSCI	foot-to-ground angle [°]	3	3	1	3	3	1	1	1	17.8307	22.2167	27.5367	0.9112	0.904	0.69077	0.492	0.492	0.391594	1.03804	1.10282	0.690562
iSCI9	2	1	2	iSCI	foot-to-ground angle [°]	3	3	2	4	4	1	1	4	18.5337	19.6186	27.5367	0.9992	1.0144	0.69077	0.4996	0.4868	0.391594	0.900083	1.10282	0.565621
iSCI9	3	2	1	iSCI	foot-to-ground angle [°]	3	3	2	5	3	0	1	2	17.6509	20.258	27.5367	1.0324	0.9332	0.69077	0.3652	0.4736	0.391594	0.992087	1.10282	0.648756
iSCI9	4	2	2	iSCI	foot-to-ground angle [°]	2	2	2	4	4	1	1	2	20.6907	20.5571	27.5367	1.0064	0.958	0.69077	0.4892	0.542	0.391594	1.00193	1.10282	0.615364
iSCI9	5	3	1	iSCI	foot-to-ground angle [°]	3	3	2	4	4	1	1	3	17.2658	20.9014	27.5367	0.9944	0.9804	0.69077	0.5188	0.5232	0.391594	0.954553	1.10282	0.595844
iSCI9	6	3	2	iSCI	foot-to-ground angle [°]	0	0	2	5	5	1	1	3	26.1831	21.7838	27.5367	1.0688	1.0552	0.69077	0.5292	0.5464	0.391594	0.951823	1.10282	0.550648
iSCI9	7	4	1	iSCI	foot-to-ground angle [°]	2	2	1	2	2	0	0	0	21.755	23.7731	27.5367	0.8668	0.8332	0.69077	0.426	0.4484	0.391594	1.07484	1.10282	0.741721
iSCI10	1	1	1	iSCI	foot-to-ground angle [°]	2	2	2	1	2	0	0	0	18.2872	19.9558	27.4401	0.762	0.8224	0.687731	0.4772	0.4128	0.389433	1.10068	1.09699	0.781439
iSCI10	2	1	2	iSCI	foot-to-ground angle [°]	0	0	2	1	3	1	0	0	27.2218	21.0194	27.4401	0.7548	0.8936	0.687731	0.5788	0.4356	0.389433	1.1316	1.09699	0.729065
iSCI10	3	2	1	iSCI	foot-to-ground angle [°]	2	2	1	1	1	0	0	0	20.1433	22.5476	27.4401	0.7736	0.7712	0.687731	0.4352	0.4312	0.389433	1.12965	1.09699	0.831283
iSCI10	4	2	2	iSCI	foot-to-ground angle [°]	1	1	2	2	2	1	0	0	20.8163	20.9437	27.4401	0.8528	0.834	0.687731	0.4608	0.4776	0.389433	1.08953	1.09699	0.748049
iSCI10	5	3	1	iSCI	foot-to-ground angle [°]	1	1	2	1	2	0	0	0	24.0965	21.613	27.4401	0.7988	0.8216	0.687731	0.4436	0.416	0.389433	1.09847	1.09699	0.773624
iSCI10	6	3	2	iSCI	foot-to-ground angle [°]	1	1	2	1	2	1	0	1	22.0777	21.6279	27.4401	0.7864	0.8348	0.687731	0.4864	0.4356	0.389433	1.13736	1.09699	0.787114
iSCI10	7	4	1	iSCI	foot-to-ground angle [°]
iSCI11	1	1	1	iSCI	stride length [m]	5	5	6	3	1	0	2	5	8.117	5.83256	27.1006	0.9252	0.7984	0.686282	0.4316	0.5616	0.386614	0.8376	1.07284	0.582946
iSCI11	2	1	2	iSCI	stride length [m]	3	5	6	4	1	0	3	3	9.82312	7.16283	27.1006	0.9788	0.8016	0.686282	0.4228	0.5996	0.386614	0.940946	1.07284	0.637787
iSCI11	3	2	1	iSCI	stride length [m]	4	5	6	3	1	1	3	4	11.1914	5.66673	27.1006	0.9248	0.7764	0.686282	0.4536	0.6	0.386614	0.907216	1.07284	0.620598
iSCI11	4	2	2	iSCI	stride length [m]	2	5	5	5	2	1	3	2	11.4112	9.51431	27.1006	1.0092	0.884	0.686282	0.5204	0.646	0.386614	0.964224	1.07284	0.600338
iSCI11	5	3	1	iSCI	stride length [m]	4	5	5	2	0	0	2	4	7.80416	8.72862	27.1006	0.808	0.7308	0.686282	0.496	0.5648	0.386614	0.871237	1.07284	0.635269
iSCI11	6	3	2	iSCI	stride length [m]	6	6	6	3	1	0	2	6	6.92303	6.77882	27.1006	0.9164	0.7648	0.686282	0.4428	0.5908	0.386614	0.814361	1.07284	0.573419
iSCI11	7	4	1	iSCI	stride length [m]	2	4	5	3	1	1	3	2	12.0793	10.4248	27.1006	0.9424	0.792	0.686282	0.47	0.6228	0.386614	0.946434	1.07284	0.634
iSCI13	1	1	1	iSCI	foot-to-ground angle [°]	5	5	0	1	1	0	0	2	10.5472	24.5775	27.3903	0.7544	0.7672	0.685395	0.3952	0.38	0.38773	0.996605	1.08552	0.766821
iSCI13	2	1	2	iSCI	foot-to-ground angle [°]	4	4	0	1	1	0	0	2	11.6532	25.0197	27.3903	0.7668	0.7716	0.685395	0.3856	0.3764	0.38773	0.987141	1.08552	0.751163
iSCI13	3	2	1	iSCI	foot-to-ground angle [°]	4	4	1	1	1	0	0	1	14.026	22.6491	27.3903	0.7628	0.754	0.685395	0.3836	0.3964	0.38773	1.0323	1.08552	0.77215
iSCI13	4	2	2	iSCI	foot-to-ground angle [°]	3	3	0	0	0	0	0	0	14.9399	25.8381	27.3903	0.752	0.7468	0.685395	0.3728	0.3752	0.38773	1.06456	1.08552	0.805943
iSCI13	5	3	1	iSCI	foot-to-ground angle [°]	4	4	1	0	0	0	0	1	13.5971	24.1003	27.3903	0.7436	0.736	0.685395	0.3828	0.3844	0.38773	1.02412	1.08552	0.763231
iSCI13	6	3	2	iSCI	foot-to-ground angle [°]	4	4	1	0	0	0	0	2	11.1535	24.2188	27.3903	0.6968	0.738	0.685395	0.4268	0.3756	0.38773	0.999238	1.08552	0.761421
iSCI13	7	4	1	iSCI	foot-to-ground angle [°]	4	4	1	0	0	0	0	2	10.583	21.7233	27.3903	0.7032	0.7464	0.685395	0.4428	0.386	0.38773	0.98004	1.08552	0.753086
iSCI14	1	1	1	iSCI	foot-to-ground angle [°]	4	4	2	4	3	2	3	0	11.6442	19.0369	26.7284	0.9468	0.8704	0.693357	0.584	0.664	0.388415	1.06219	1.07281	0.626082
iSCI14	2	1	2	iSCI	foot-to-ground angle [°]	2	2	1	3	4	2	2	0	18.2271	22.0769	26.7284	0.9676	0.9664	0.693357	0.6016	0.602	0.388415	1.07197	1.07281	0.615671
iSCI14	3	2	1	iSCI	foot-to-ground angle [°]	3	3	2	2	2	2	2	0	15.8865	19.253	26.7284	0.8332	0.8872	0.693357	0.6368	0.5684	0.388415	1.05185	1.07281	0.670677
iSCI14	4	2	2	iSCI	foot-to-ground angle [°]	3	3	2	1	1	2	2	0	16.2094	20.0751	26.7284	0.802	0.804	0.693357	0.5628	0.56	0.388415	1.12165	1.07281	0.761571
iSCI14	5	3	1	iSCI	foot-to-ground angle [°]	3	3	2	2	2	2	2	1	15.7105	18.3523	26.7284	0.8156	0.8348	0.693357	0.5844	0.5684	0.388415	1.12723	1.07281	0.731919
iSCI14	6	3	2	iSCI	foot-to-ground angle [°]	3	3	2	1	1	2	2	1	15.5448	19.8067	26.7284	0.7836	0.8008	0.693357	0.5692	0.5468	0.388415	1.14089	1.07281	0.77252
iSCI14	7	4	1	iSCI	foot-to-ground angle [°]
iSCI15	1	1	1	iSCI	foot-to-ground angle [°]	4	3	3	2	3	1	0	4	15.6145	15.3235	27.4308	0.8744	0.9632	0.693136	0.5548	0.456	0.394455	0.901098	1.08315	0.587705
iSCI15	2	1	2	iSCI	foot-to-ground angle [°]	3	3	3	3	4	1	0	4	16.6511	16.072	27.4308	0.9068	0.9864	0.693136	0.5524	0.4588	0.394455	0.90123	1.08315	0.571147
iSCI15	3	2	1	iSCI	foot-to-ground angle [°]	3	3	2	3	3	1	1	4	15.6736	18.2892	27.4308	0.8624	0.9648	0.693136	0.5864	0.4688	0.394455	0.884156	1.08315	0.574007
iSCI15	4	2	2	iSCI	foot-to-ground angle [°]	3	3	3	3	4	1	0	4	16.6402	17.791	27.4308	0.9344	0.9996	0.693136	0.5072	0.4388	0.394455	0.89524	1.08315	0.591595
iSCI15	5	3	1	iSCI	foot-to-ground angle [°]	3	3	2	2	3	2	0	4	16.872	19.7959	27.4308	0.7928	0.9652	0.693136	0.6216	0.4284	0.394455	0.917886	1.08315	0.608873
iSCI15	6	3	2	iSCI	foot-to-ground angle [°]	3	3	3	2	3	1	0	4	14.5494	18.397	27.4308	0.898	0.976	0.693136	0.5172	0.43	0.394455	0.892854	1.08315	0.6097
iSCI15	7	4	1	iSCI	foot-to-ground angle [°]	2	2	2	1	2	1	0	0	18.0449	21.8303	27.4308	0.8004	0.8844	0.693136	0.5292	0.4308	0.394455	1.02686	1.08315	0.711951
stroke2	1	1	1	stroke	stride length [m]	8	1	1	0	0	0	0	8	24.0046	32.4223	27.5154	0.7116	0.7116	0.693655	0.3988	0.3988	0.394155	1.43335	1.10974
stroke2	2	1	2	stroke	stride length [m]
stroke2	3	2	1	stroke	stride length [m]	4	1	1	0	0	1	1	4	21.3564	30.7025	27.5154	0.7242	0.7242	0.693655	0.4614	0.4614	0.394155	1.271	1.10974
stroke2	4	2	2	stroke	stride length [m]	2	1	1	0	0	0	0	2	22.1134	30.7784	27.5154	0.7558	0.7558	0.693655	0.4156	0.4156	0.394155	1.21271	1.10974
stroke2	5	3	1	stroke	stride length [m]	4	2	1	0	0	0	0	4	20.7753	30.8181	27.5154	0.7198	0.7198	0.693655	0.4304	0.4304	0.394155	1.29676	1.10974
stroke2	6	3	2	stroke	stride length [m]	3	2	0	0	0	0	0	3	21.2618	27.8722	27.5154	0.7182	0.7182	0.693655	0.4108	0.4108	0.394155	1.25501	1.10974
stroke2	7	4	1	stroke	stride length [m]
stroke1	1	1	1	stroke	stance duration [s]	5	1	2	5	3	0	0	2	22.8316	19.5234	27.4355	1.0248	0.9624	0.686935	0.3928	0.452	0.388888	0.980491	1.09437	0.639268
stroke1	2	1	2	stroke	stance duration [s]	2	0	0	2	2	0	0	1	22.1866	27.106	27.4355	0.8284	0.8204	0.686935	0.3552	0.362	0.388888	1.05677	1.09437	0.816117
stroke1	3	2	1	stroke	stance duration [s]	1	3	4	1	0	0	0	3	16.517	14.83	27.4355	0.8064	0.78	0.686935	0.3484	0.3684	0.388888	0.949033	1.09437	0.766919
stroke1	4	2	2	stroke	stance duration [s]	1	3	1	1	1	0	0	2	16.0453	22.7206	27.4355	0.7696	0.7752	0.686935	0.38	0.3704	0.388888	0.994706	1.09437	0.819579
stroke1	5	3	1	stroke	stance duration [s]	1	0	0	1	1	0	0	1	22.8811	23.7918	27.4355	0.776	0.7672	0.686935	0.3528	0.3604	0.388888	1.06214	1.09437	0.830498
stroke1	6	3	2	stroke	stance duration [s]	0	0	0	0	0	0	0	0	23.8996	25.8442	27.4355	0.7404	0.7384	0.686935	0.3344	0.33	0.388888	1.11015	1.09437	0.922586
stroke1	7	4	1	stroke	stance duration [s]	1	4	3	1	1	0	0	1	12.998	18.1402	27.4355	0.7584	0.7784	0.686935	0.3896	0.3704	0.388888	1.02134	1.09437	0.807112
stroke3	1	1	1	stroke	stance duration [s]	2	1	4	2	0	1	1	0	30.2729	13.0937	27.5363	0.8616	0.6708	0.693651	0.3252	0.518	0.393386	1.10132	1.10481
stroke3	2	1	2	stroke	stance duration [s]	1	1	3	1	1	1	1	0	31.0001	16.0531	27.5363	0.7896	0.6056	0.693651	0.3272	0.5124	0.393386	1.13114	1.10481
stroke3	3	2	1	stroke	stance duration [s]	1	1	3	1	0	0	1	0	29.5749	15.8472	27.5363	0.7912	0.6584	0.693651	0.3524	0.4884	0.393386	1.13423	1.10481
stroke3	4	2	2	stroke	stance duration [s]	1	2	2	1	0	1	1	0	31.6503	19.0505	27.5363	0.7924	0.6144	0.693651	0.3268	0.5068	0.393386	1.1303	1.10481
stroke3	5	3	1	stroke	stance duration [s]	1	0	2	1	1	0	1	0	27.7787	17.9525	27.5363	0.7084	0.6256	0.693651	0.4192	0.4996	0.393386	1.09651	1.10481
stroke3	6	3	2	stroke	stance duration [s]	1	2	3	1	1	1	0	0	32.7615	16.1528	27.5363	0.743462	0.606	0.693651	0.338462	0.478	0.393386	1.13504	1.10481
stroke3	7	4	1	stroke	stance duration [s]	1	2	1	1	1	1	1	0	33.5361	20.3557	27.5363	0.702	0.5916	0.693651	0.3984	0.508	0.393386	1.13807	1.10481	0.869883
stroke4	1	1	1	stroke	foot-to-ground angle [°]	2	2	2	0	0	0	0	1	18.5974	18.6811	26.9713	0.663704	0.646	0.687709	0.449259	0.4568	0.386447	1.01989	1.06408	0.79297
stroke4	2	1	2	stroke	foot-to-ground angle [°]	0	0	2	0	0	0	0	0	25.4319	18.2892	26.9713	0.617692	0.6344	0.687709	0.481923	0.51	0.386447	1.05035	1.06408	0.817848
stroke4	3	2	1	stroke	foot-to-ground angle [°]	2	2	2	0	0	1	1	1	20.5793	19.7567	26.9713	0.6012	0.6252	0.687709	0.5568	0.5128	0.386447	0.984459	1.06408	0.739735
stroke4	4	2	2	stroke	foot-to-ground angle [°]	1	1	1	0	0	1	0	1	22.9705	22.3279	26.9713	0.6088	0.6768	0.687709	0.5004	0.434	0.386447	1.02203	1.06408	0.807525
stroke4	5	3	1	stroke	foot-to-ground angle [°]	0	0	2	0	0	1	0	1	23.1127	19.6564	26.9713	0.6552	0.6388	0.687709	0.476	0.4892	0.386447	0.998498	1.06408	0.767201
stroke4	6	3	2	stroke	foot-to-ground angle [°]	0	0	1	0	0	0	0	1	25.5883	23.6424	26.9713	0.633448	0.63	0.687709	0.483448	0.5032	0.386447	0.987691	1.06408	0.756909
stroke4	7	4	1	stroke	foot-to-ground angle [°]	2	2	2	0	0	1	1	1	20.1381	18.4484	26.9713	0.6608	0.6844	0.687709	0.4692	0.452	0.386447	0.995198	1.06408	0.771314
stroke5	1	1	1	stroke	foot-to-ground angle [°]	7	7	0	3	1	0	1	1	7.79903	24.3064	27.4132	0.4904	0.5924	0.686009	0.4028	0.3008	0.388217	1.0047	1.08998	0.979168
stroke5	2	1	2	stroke	foot-to-ground angle [°]	2	2	0	2	1	0	1	1	13.689	27.0152	27.4132	0.511923	0.592	0.686009	0.378846	0.298	0.388217	1.05493	1.08998	1.00398
stroke5	3	2	1	stroke	foot-to-ground angle [°]	2	2	2	1	1	0	0	2	18.7448	17.6806	27.4132	0.556	0.5724	0.686009	0.3564	0.326	0.388217	0.976884	1.08998	0.910688
stroke5	4	2	2	stroke	foot-to-ground angle [°]	2	2	0	2	1	0	1	0	15.9293	29.7978	27.4132	0.5196	0.5952	0.686009	0.3604	0.2828	0.388217	1.09363	1.08998	1.03932
stroke5	5	3	1	stroke	foot-to-ground angle [°]	3	3	0	2	1	0	1	1	13.4176	26.142	27.4132	0.4976	0.5812	0.686009	0.386	0.3024	0.388217	1.01988	1.08998	0.969932
stroke5	6	3	2	stroke	foot-to-ground angle [°]	2	2	3	2	1	0	0	1	17.0316	15.3347	27.4132	0.5188	0.5484	0.686009	0.3708	0.338	0.388217	1.04736	1.08998	1.0113
stroke5	7	4	1	stroke	foot-to-ground angle [°]	2	2	0	2	1	0	1	1	17.5149	23.1293	27.4132	0.5024	0.564	0.686009	0.3572	0.2928	0.388217	1.01881	1.08998	1.01259
stroke6	1	1	1	stroke	stance duration [s]	6	7	3	6	1	0	5	6	5.76215	15.7226	27.4115	1.15	0.6892	0.688969	0.4076	0.8764	0.390235	0.844605	1.0987	0.518339
stroke6	2	1	2	stroke	stance duration [s]	6	6	3	6	2	0	5	3	6.71477	17.6684	27.4115	1.1368	0.84	0.688969	0.45	0.7564	0.390235	0.952214	1.0987	0.608188
stroke6	3	2	1	stroke	stance duration [s]	5	6	5	5	1	0	3	3	7.50621	11.4774	27.4115	1.084	0.7588	0.688969	0.4076	0.6692	0.390235	0.924417	1.0987	0.585337
stroke6	4	2	2	stroke	stance duration [s]	6	6	3	6	2	0	4	3	7.44875	17.9009	27.4115	1.1188	0.7404	0.688969	0.428	0.8168	0.390235	0.955933	1.0987	0.576777
stroke6	5	3	1	stroke	stance duration [s]	5	7	4	5	1	0	5	4	6.14854	13.1609	27.4115	1.0884	0.708	0.688969	0.4528	0.8464	0.390235	0.945066	1.0987	0.579312
stroke6	6	3	2	stroke	stance duration [s]	6	6	3	6	2	0	4	3	6.68294	16.8285	27.4115	1.1044	0.7836	0.688969	0.446	0.7788	0.390235	0.9666	1.0987	0.595992
stroke6	7	4	1	stroke	stance duration [s]	6	7	4	6	2	0	5	3	5.99255	14.577	27.4115	1.1256	0.8852	0.688969	0.4428	0.6832	0.390235	0.92551	1.0987	0.564979
stroke7	1	1	1	stroke	foot-to-ground angle [°]	6	6	3	0	1	2	0	4	7.90244	17.1991	27.4181	0.6904	0.822	0.686719	0.5332	0.406	0.388677	0.910647	1.09331	0.665759
stroke7	2	1	2	stroke	foot-to-ground angle [°]	4	4	3	0	1	2	0	3	13.0291	16.0488	27.4181	0.6832	0.8164	0.686719	0.578	0.448	0.388677	0.963206	1.09331	0.670798
stroke7	3	2	1	stroke	foot-to-ground angle [°]	4	4	2	0	1	1	0	4	12.6387	18.4586	27.4181	0.6972	0.7268	0.686719	0.5156	0.4908	0.388677	0.93771	1.09331	0.686872
stroke7	4	2	2	stroke	foot-to-ground angle [°]	5	5	3	0	1	1	0	2	11.4372	17.6687	27.4181	0.6744	0.7624	0.686719	0.5284	0.4544	0.388677	1.00083	1.09331	0.733532
stroke7	5	3	1	stroke	foot-to-ground angle [°]	4	4	3	0	1	1	0	3	12.7558	17.215	27.4181	0.6724	0.7532	0.686719	0.5408	0.4636	0.388677	0.960092	1.09331	0.701737
stroke7	6	3	2	stroke	foot-to-ground angle [°]	3	3	1	0	1	2	1	2	15.7716	22.4533	27.4181	0.7364	0.726	0.686719	0.56	0.5716	0.388677	0.986474	1.09331	0.656265
stroke7	7	4	1	stroke	foot-to-ground angle [°]	4	4	3	1	2	2	0	3	13.4407	17.5506	27.399	0.7512	0.8484	0.686542	0.5416	0.4552	0.388479	0.938497	1.09222	0.645596
stroke9	1	1	1	stroke	swing duration [s]	4	6	4	1	4	4	1	1	5.95266	11.0426	27.4991	0.7836	0.9612	0.686838	0.6936	0.5148	0.376099	0.985055	1.05458	0.624834
stroke9	2	1	2	stroke	swing duration [s]	2	7	4	0	2	2	0	2	2.54394	12.6581	27.4991	0.7032	0.8416	0.686838	0.5444	0.3816	0.376099	0.940343	1.05458	0.710955
stroke9	3	2	1	stroke	swing duration [s]	2	6	5	1	3	2	0	4	5.67972	10.186	27.4991	0.7816	0.884	0.686838	0.5288	0.436	0.376099	0.873898	1.05458	0.620944
stroke9	4	2	2	stroke	swing duration [s]	2	7	5	0	2	2	0	2	4.44857	10.788	27.4991	0.6828	0.8324	0.686838	0.5424	0.3844	0.376099	0.946409	1.05458	0.736227
stroke9	5	3	1	stroke	swing duration [s]	2	5	6	0	2	2	0	3	7.76797	7.56639	27.4991	0.705769	0.8676	0.686838	0.565385	0.4032	0.376099	0.921814	1.05458	0.677605
stroke9	6	3	2	stroke	swing duration [s]	2	6	5	0	2	2	0	2	6.73427	11.393	27.4991	0.7428	0.8872	0.686838	0.5384	0.3872	0.376099	0.9556	1.05458	0.695099
stroke9	7	4	1	stroke	swing duration [s]	3	7	4	0	2	3	0	1	3.41329	13.2033	27.4991	0.7056	0.8956	0.686838	0.5856	0.4024	0.376099	0.962962	1.05458	0.698995
stroke10	1	1	1	stroke	foot-to-ground angle [°]	1	1	4	1	0	0	0	2	21.2078	13.6964	27.4504	0.7764	0.7328	0.687019	0.3936	0.4392	0.389001	0.988162	1.09474	0.763291
stroke10	2	1	2	stroke	foot-to-ground angle [°]	0	0	4	2	1	0	1	2	23.5809	11.8804	27.4504	0.8636	0.7888	0.687019	0.426	0.5024	0.389001	0.971495	1.09474	0.68564
stroke10	3	2	1	stroke	foot-to-ground angle [°]	2	2	5	1	1	0	0	4	20.8233	10.9928	27.4504	0.7912	0.7648	0.687019	0.4164	0.438	0.389001	0.927399	1.09474	0.697795
stroke10	4	2	2	stroke	foot-to-ground angle [°]	1	1	5	1	1	0	0	2	18.1586	9.31581	27.4504	0.7796	0.7644	0.687019	0.4312	0.4444	0.389001	1.0137	1.09474	0.761488
stroke10	5	3	1	stroke	foot-to-ground angle [°]	2	2	5	1	1	0	0	4	15.9692	9.71553	27.4504	0.7732	0.7644	0.687019	0.4316	0.4424	0.389001	0.922292	1.09474	0.718459
stroke10	6	3	2	stroke	foot-to-ground angle [°]	3	3	4	0	0	0	0	3	17.4725	12.6702	27.4504	0.7564	0.7516	0.687019	0.3932	0.3932	0.389001	0.973155	1.09474	0.777636
stroke10	7	4	1	stroke	foot-to-ground angle [°]
stroke11	1	1	1	stroke	foot-to-ground angle [°]	6	6	4	0	1	0	0	0	6.84662	15.2769	27.386	0.776923	0.836	0.693334	0.419615	0.3856	0.393747	1.05706	1.10325	0.809909
stroke11	2	1	2	stroke	foot-to-ground angle [°]	5	5	4	0	2	0	0	0	11.9099	14.6199	27.386	0.7716	0.844	0.693334	0.4308	0.3544	0.393747	1.08891	1.10325	0.826826
stroke11	3	2	1	stroke	foot-to-ground angle [°]	5	5	3	1	2	0	0	1	8.60832	15.0393	27.386	0.8144	0.8832	0.693334	0.4472	0.3632	0.393747	1.05195	1.10325	0.774694
stroke11	4	2	2	stroke	foot-to-ground angle [°]	3	3	2	1	2	0	0	0	15.5129	18.3248	27.386	0.782	0.8644	0.693334	0.436	0.3528	0.393747	1.07743	1.10325	0.788037
stroke11	5	3	1	stroke	foot-to-ground angle [°]	4	4	3	1	2	0	0	1	14.6212	16.1107	27.386	0.8276	0.8956	0.693334	0.426	0.352	0.393747	1.03437	1.10325	0.745654
stroke11	6	3	2	stroke	foot-to-ground angle [°]	5	5	3	1	2	0	0	0	10.2909	17.0016	27.386	0.7872	0.8968	0.693334	0.4692	0.3508	0.393747	1.0551	1.10325	0.767424
stroke11	7	4	1	stroke	foot-to-ground angle [°]	4	4	3	1	2	0	0	0	11.7324	16.6951	27.386	0.7828	0.8608	0.693334	0.46	0.3792	0.393747	1.09077	1.10325	0.800405
stroke8	1	1	1	stroke	swing duration [s]	1	3	5	0	1	1	0	0	17.0262	9.73314	27.4638	0.7256	0.7784	0.693441	0.4868	0.4388	0.394054	1.12156	1.10701	0.83346
stroke8	2	1	2	stroke	swing duration [s]	0	4	5	0	0	0	0	1	13.6123	9.89549	27.4638	0.6412	0.6684	0.693441	0.4576	0.4264	0.394054	1.17665	1.10701	0.97006
stroke8	3	2	1	stroke	swing duration [s]	0	4	5	1	0	0	0	1	11.826	10.8168	27.4638	0.5892	0.6804	0.693441	0.5008	0.408	0.394054	1.16468	1.10701	0.959791
stroke8	4	2	2	stroke	swing duration [s]	0	4	4	1	0	0	0	2	15.41	12.5888	27.4638	0.607308	0.652	0.693441	0.422692	0.3936	0.394054	1.19272	1.10701	1.03318
stroke8	5	3	1	stroke	swing duration [s]	0	3	4	1	0	0	0	2	13.7903	11.8433	27.4638	0.5816	0.6364	0.693441	0.4744	0.4152	0.394054	1.18788	1.10701	1.02583
stroke8	6	3	2	stroke	swing duration [s]	0	3	5	1	0	0	0	2	15.209	9.57412	27.4638	0.5948	0.616	0.693441	0.4208	0.4072	0.394054	1.17892	1.10701	1.05797
stroke8	7	4	1	stroke	swing duration [s]	0	4	4	1	1	0	0	3	11.3856	12.14	27.4463	0.5468	0.586	0.693226	0.4372	0.3928	0.393843	1.23861	1.10595	1.13401
