# Supplementary material for: Trainer in a pocket - proof-of-concept of mobile, real-time, foot kinematics feedback for gait pattern normalization in individuals after stroke, incomplete spinal cord injury and elderly patients
Source: J Neuroeng Rehabil. 2018 May 29;15:44. doi: 10.1186/s12984-018-0389-4 (PMC5975685; doi:10.1186/s12984-018-0389-4)
Supplement: Supplementary file 4 — Complete dataset of walk test results. Complete dataset listing results of the 10-m walk test (10MWT) and Timed up and go test (TUG). (XLSX 12 kb) [file 12984_2018_389_MOESM4_ESM.xlsx]

## Sheet: data_results_walktests
ID	group	10MWT 1 [m/s]	10MWT 2 [m/s]	10MWT 3 [m/s] (follow-up)	TUG 1 [s]	TUG 2 [s]	TUG 3 [s] (follow-up)
elderly1	elderly	0.77	0.83		16	16
elderly10	elderly	0.83	0.77		12	13
elderly11	elderly	0.83	0.91		12	13
elderly12	elderly	0.53	0.48		28	29
elderly13	elderly	0.56	0.59		20	23
elderly14	elderly	1.25	1.25		11	11
elderly15	elderly	0.5	0.59		18	16
elderly2	elderly	0.4	0.53		34	24
elderly3	elderly	0.91	0.77		15	15
elderly4	elderly	0.63	0.56		22	22
elderly5	elderly	1	1		11	10
elderly6	elderly	0.71	0.77		17	20
elderly7	elderly	0.83	0.83		12	11
elderly8	elderly	0.42	0.63		22	17
elderly9	elderly	0.48	0.53		30	22
iSCI3	iSCI	1.07	0.93	1.03	13.06	10.83	12.52
iSCI4	iSCI	0.85	0.7	0.75	15.39	16.79	15.69
iSCI1	iSCI	1.35	1.46	1.32	6.39	6.87	6.62
iSCI2	iSCI	0.41	0.55	0.45	38.81	28.43	30.95
iSCI5	iSCI	1.37	1.43		9.41	10.41
iSCI12	iSCI	0.93	0.8	0.94	10.81	11.93	9.96
iSCI7	iSCI	0.32	0.33		42.69	40.73
iSCI6	iSCI	0.58	0.62	0.58	16.83	14.75	19.4
iSCI8	iSCI	1.12	1.14	1.3	10.82	10.03	9.5
iSCI9	iSCI	0.9	0.78	0.93	15.65	16.75	15.21
iSCI10	iSCI	0.92	0.97		13.4	12.58
iSCI11	iSCI	0.58	0.59	0.73
iSCI13	iSCI	0.91	0.91	0.99	11.03	10.66	11.04
iSCI14	iSCI	0.96	0.97		13.49	13.01
iSCI15	iSCI	0.66	0.69	0.79	14.29	13	11.97
stroke2	stroke	1.75	1.44		7.17	7.4
stroke1	stroke	0.75	1.05	0.81	12.47	14.24	9.22
stroke3	stroke	1.09	0.97		10.43	10.23
stroke4	stroke	1.24	1.09	1.07	10.02	8.46	10.3
stroke5	stroke	1.27	1.32	1.34	9.76	8.91	9.5
stroke6	stroke	0.62	0.67	0.67	18.29	17.28	23.83
stroke7	stroke	0.8	0.87	0.79	15.16	14.49	14.65
stroke9	stroke	0.73	0.74	0.68	15.6	16.07	15.82
stroke10	stroke	1.14	1.14		12.5	10.67
stroke11	stroke	1.06	1.01		12.48	11.39
stroke8	stroke	0.98	1.12	1.2	12.9	11.79	10.29
