# Supplementary material for: Trainer in a pocket - proof-of-concept of mobile, real-time, foot kinematics feedback for gait pattern normalization in individuals after stroke, incomplete spinal cord injury and elderly patients
Source: J Neuroeng Rehabil. 2018 May 29;15:44. doi: 10.1186/s12984-018-0389-4 (PMC5975685; doi:10.1186/s12984-018-0389-4)
Supplement: Supplementary file 5 — Complete dataset of end user survey results. Complete dataset listing results on the questionnaire based on the modified Quebec user evaluation of satisfaction with assistive technology (QUEST). Responses on a 5 point ordinal scale (1 = not satisfied at all, 2 = not satisfied, 3 = more or less satisfied, 4 = quite satisfied, 5 = very satisfied) of category-specific questions are followed by the selection of users’ most important categories (1 = selected). The last column contains the results of a visual analogue scale (VAS, 0–1) rating. (XLSX 13 kb) [file 12984_2018_389_MOESM5_ESM.xlsx]

## Sheet: Rehagait_Quest_ergebnisse
group	ID		safety	wellbeing (physically)	wellbeing (emotionally)	efficacy (movement aims)	efficacy (learning)	FB design (verbalized FB)	FB design (changes in level)	FB design (FB frequency)	FB design (FB reactivity)	FB design (information content)	reliability		safety	wellbeing	efficacy	FB design	reliability		VAS rating
elderly	elderly1		4	4	4	4	4	4	3	4	4	3			1	0	1	0	0		0.71
elderly	elderly2		4	5	5	3	4	4	3	4	3	4	4		0	0	1	0	1		0.48
elderly	elderly3		4	5	5	4	4	4	3	3	3	3			0	1	1	0	0		0.75
elderly	elderly4		5	5	5	5	5	4	4	5	3	5			0	0	1	0	0		0.75
elderly	elderly5		4	4	2	3	4	4	3	4	2	4	4		0	1	0	1	0		0.77
elderly	elderly6		5	5	4	4	3	4	5	4	3	4			0	0	1	1	0		0.88
elderly	elderly7		5	4	4	5	3	4	4	5	4	3	4		1	0	0	0	1		0.88
elderly	elderly8		4	4	4	4	4	4	3	3	4	4			1	0	1	0	0		0.69
elderly	elderly9		3	4	4	3	3	4	4	4	3	4			1	1	0	0	0		0.94
elderly	elderly10		5	5	5	3	3	4	3	4	2	4			0	1	1	0	0		0.86
elderly	elderly11		5	5	5	4	1	3	3	4		5			1	1	0	0	0		0.65
elderly	elderly12		5	5	5	5	3	5	4	4	4	5	5		0	0	1	0	1		0.83
elderly	elderly13		3	5	5	2	3	2	3	1	3	2	3		1	0	0	0	1		0.64
elderly	elderly14		5	4	4	4	3	5	3	4	4	3			1	0	1	0	0		0.6
iSCI	iSCI3		5	5	5	5	5	5	4	5	3	5	5		1	0	1	0	0		0.967
iSCI	iSCI4		4	4	4			3	4	3	4	4	4		0	0	1	1	0		0.892
iSCI	iSCI1		5	5	5	5	5	4	5	4	5	5			0	0	1	0	1		0.958
iSCI	iSCI2		5	5	5	5	5	5	5	5	5	4	5		0	0	1	1	0		0.958
iSCI	iSCI5		5	4	3	3	4	3	4	4	3	4	4		0	0	1	0	1		0.808
iSCI	iSCI12		5	4	5	4	3	4	4	4	4	4	3		1	0	1	0	0		0.904
iSCI	iSCI7		4	4	4			5	4	4	4	5	5		1	0	0	0	0		0.971
iSCI	iSCI6		5	5	5	4	4	5	5	4	4	5	5		0	0	1	0	1		0.975
iSCI	iSCI8		5	4	5			5	3	5	5	3	5		0	0	1	1	0		0.908
iSCI	iSCI9		5	5	5	4	4	4	3	4	3	4	4		0	0	1	1	0		0.8471
iSCI	iSCI10		5	4	4	3	4	3	3	4	4	4	3		0	0	1	0	1		0.624
iSCI	iSCI13		4	5		4	4	4	4	3	4	4	4		0	1	1	0	0		0.624
iSCI	iSCI14		5	5		4	4	5	3	4	4	4			0	0	1	0	1		0.607
iSCI	iSCI15			5	3	5	5	3	4	3	4	3	3		0	1	1	0	0		0.566
stroke	stroke2		5	4	4			3		3	4	4			0	0	1	1	1		0.76
stroke	stroke1		5	5	5	5	5	4	4	5	4	5			0	0	1	0	0		0.818
stroke	stroke3		3	3	4	4	5	5	4	3	4	4	3		0	1	1	0	0		0.574
stroke	stroke4		5	4	4	5	4	5	5	5	4	4	4		0	0	1	1	0		0.748
stroke	stroke5		5	3	2	3	3	4	4	4	2	3	4		0	1	1	0	0		0.57
stroke	stroke6		4	4	4	4	5	5	4	5	4	5	4		1	0	1	0	0		0.785
stroke	stroke7		4	4	4	4	4	4	4	4	5	5	4		0	0	1	1	0		0.831
stroke	stroke9		4	5	4	4	4	4	4	5	4	3	4		0	0	1	1	0		0.785
stroke	stroke10		4	4	4	4	4	2	4	2	2	2	3		1	1	0	0	0		0.711
stroke	stroke11		5	5	5	4	5	3	2	5	5	4			0	0	1	1	0		0.847
stroke	stroke8		4	3	4	4	4	3	4	4	4	3	4		1	0	0	0	1		0.855
